# Supplementary material for: Ordered macroporous CH3NH3PbI3 perovskite semitransparent film for high-performance solar cells
Source: Royal Society of Chemistry journal article supplement (doi:10.1039/c6ta06232f), 2016-01-01
Supplement: c6ta06232f1.pdf [file c6ta06232f1.pdf]

## Electronic Supplementary Information

### Ordered macroporous $\text{CH}_3\text{NH}_3\text{PbI}_3$ perovskite semitransparent film for high-performance solar cells

Bai-Xue Chen, Hua-Shang Rao, Hong-Yan Chen, Wen-Guang Li, Dai-Bin Kuang\* and Cheng-Yong Su

MOE Key Laboratory of Bio inorganic and Synthetic Chemistry, Lehn Institute of Functional Materials, School of Chemistry and Chemical Engineering, Sun Yat-sen University, Guangzhou 510275, P. R. China

\* Corresponding author.

Fax: (+86) 20-8411 3015.

E-mail: [kuangdb@mail.sysu.edu.cn](mailto:kuangdb@mail.sysu.edu.cn)

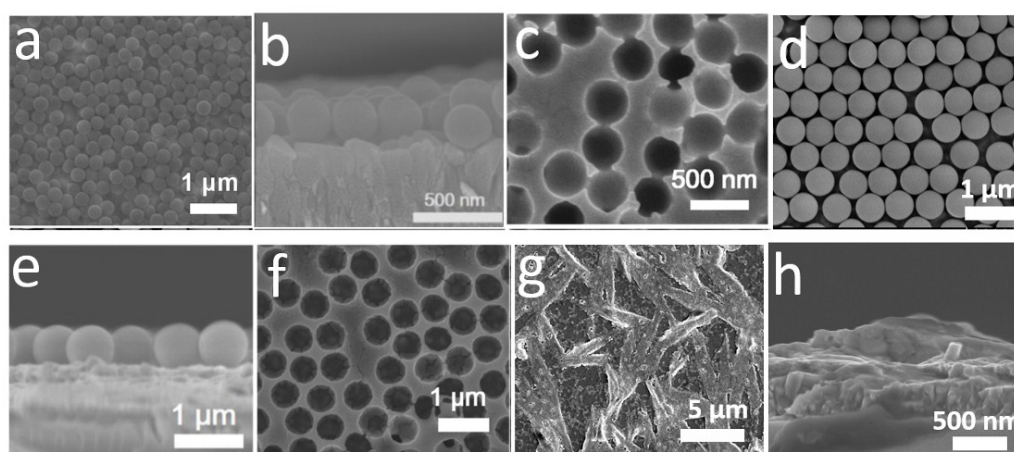

**Fig. S1.** (a) The top-view and (b) the cross-section SEM images of 200 nm PS monolayer. (c) The top-view SEM image for 200 nm perovskite film. (d) The top-view and (e) the cross-section SEM

images of 600 nm PS monolayer. (f) The top-view SEM images for 600 nm perovskite film. (g) The top-view and (h) the cross-section SEM images of island perovskite layer.

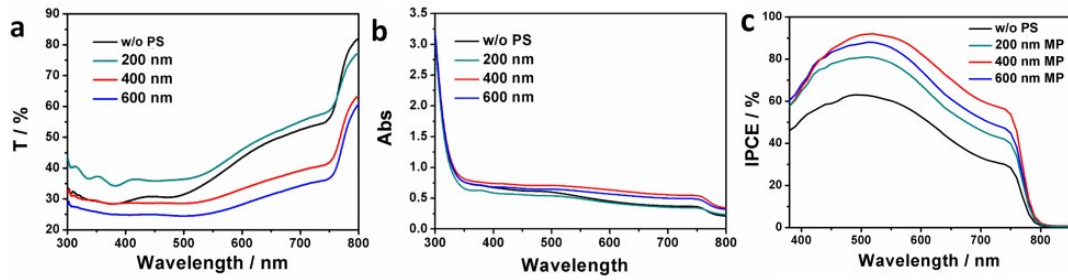

Fig. S2. (a) Transmittance spectra of MP perovskite with various pore sizes excluded the effect on FTO/TiO<sub>2</sub> substrate. (b) The absorption spectra of MP perovskite with various pore sizes deposited on FTO/TiO<sub>2</sub> substrate. (c) The IPCE spectra of MP perovskite with various pore sizes and island-like perovskite solar devices.

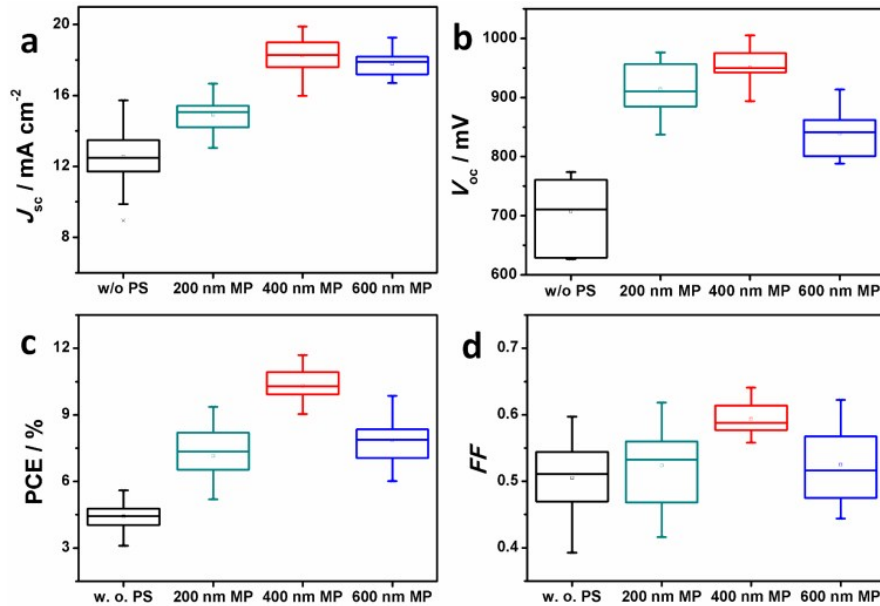

Fig. S3. The box-chart images of photovoltaic parameters for 20 devices based on MP perovskite films with various pore sizes and island-like perovskite film.

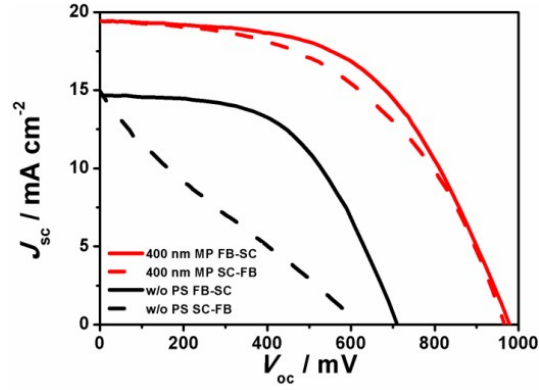

**Fig. S4.** The  $J$ - $V$  curves performed from forward bias to short circuit (FB-SC, solid line) and from short circuit to forward bias (SC-FB, dashed line) for the typical PSC devices based on 400 nm MP and island-like perovskites.

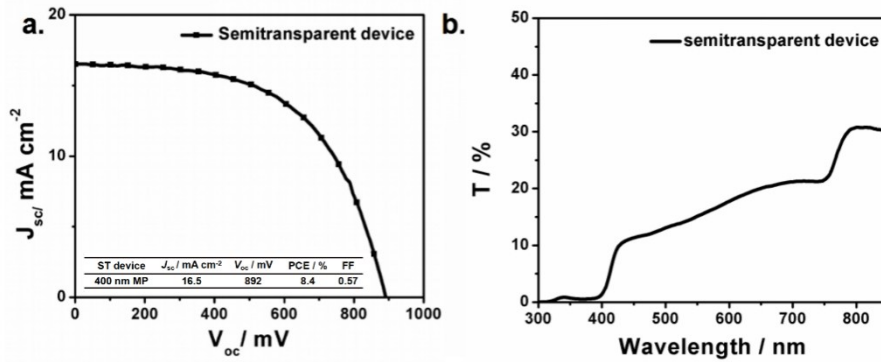

**Fig. S5.** (a) The  $J$ - $V$  curves of semitransparent perovskite solar cells based on 400 nm MP perovskite and ~20 nm Au cathode. (b) Transmittance spectra of the whole device.

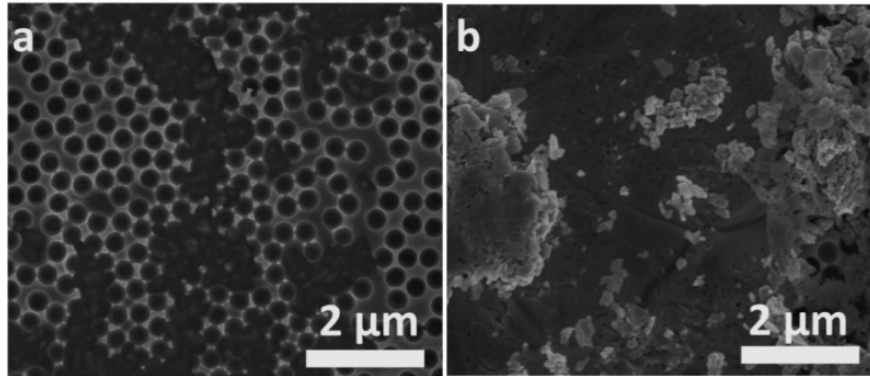

**Fig. S6.** The top-view of 400 nm MP perovskite film with 0.4 M precursor (a) and 0.8 M precursor (b).

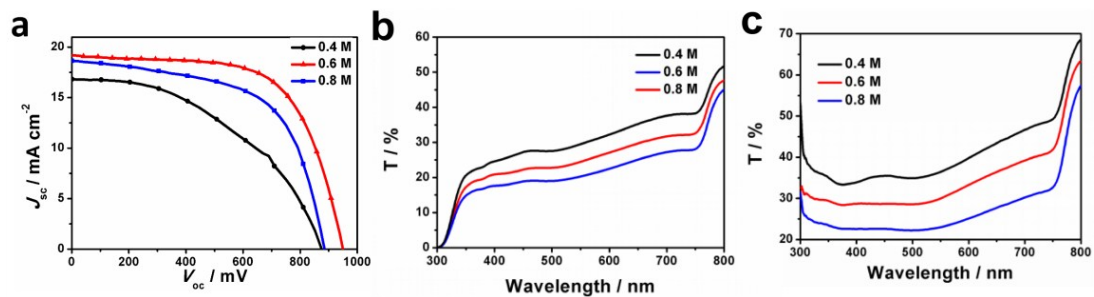

**Fig. S7.** (a) The  $J$ - $V$  curves of typical 400 nm MP perovskite solar cells with various precursor concentrations measured under AM 1.5 G one sun ( $100 \text{ mWcm}^{-2}$ ) illumination. (b) Transmittance spectra of MP perovskite with various precursor concentrations deposited on FTO/TiO<sub>2</sub> substrate. (c) Transmittance spectra of MP perovskite with various precursor concentrations excluded the effect on FTO/TiO<sub>2</sub> substrate.

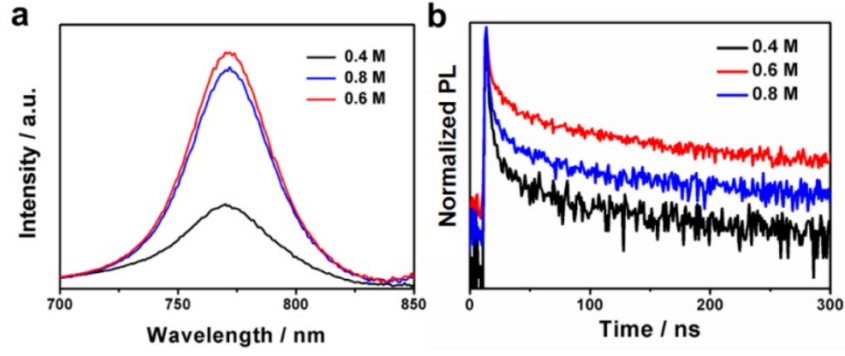

**Fig. S8.** (a) Steady-state photoluminescence (PL) (excitation at 406.2 nm) and (b) Time-resolved photoluminescence (TRPL) spectra (excitation at 406.2 nm and emission at 760 nm) of 400 nm MP perovskite films with various precursor concentrations.

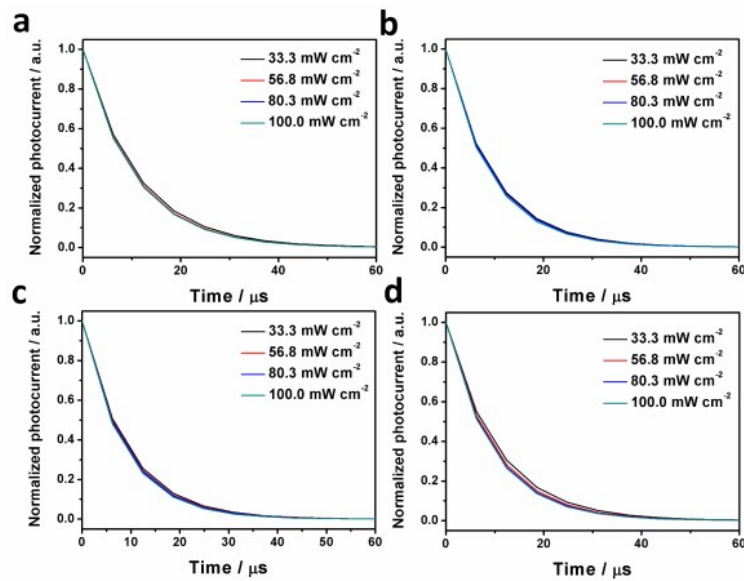

**Fig. S9.** The single exponential fitted transient photocurrent decay curves of island-like (a), 200 nm MP (b), 400 nm MP (c) and 600 nm (d) MP perovskite solar devices.

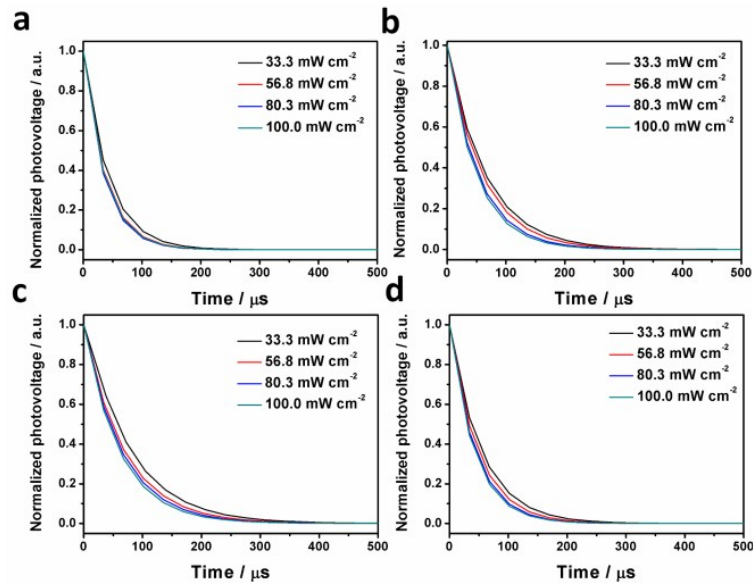

**Fig. S10.** The single exponential fitted transient photovoltage decay of island-like (a), 200 nm MP (b), 400 nm MP (c) and 600 nm (d) MP perovskite solar devices.

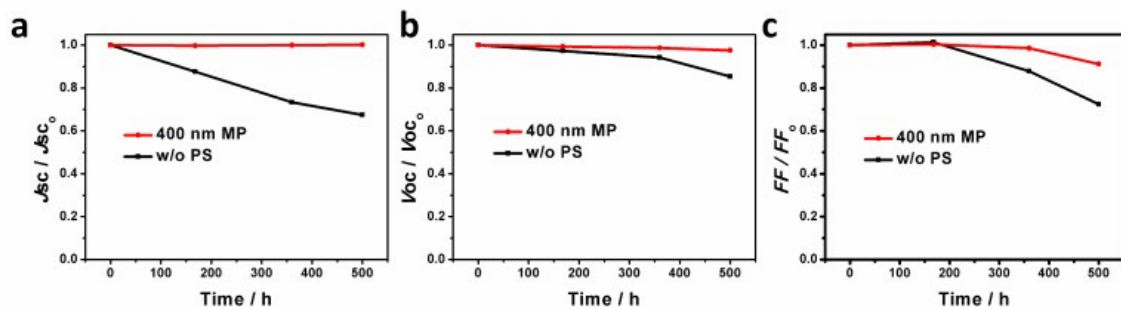

**Fig. S11.** The variations of  $J_{sc}$ ,  $V_{oc}$  and  $FF$  for devices based on 400 nm MP perovskite and island-like perovskite during 500 h aging in ambient dry air.

**Table S1.** The max PCE and average values of photovoltaic parameters which extracted from measuring current density-voltage curves at simulated one sun illumination for precursor concentrations of 0.4 M and 0.8 M (100 mW cm<sup>-2</sup>, AM 1.5 G).

|       |         | $J_{sc}/\text{mA cm}^{-2}$ | $V_{oc}/\text{mV}$ | PCE/% | FF   |
|-------|---------|----------------------------|--------------------|-------|------|
| 0.4 M | Max     | 16.1                       | 759                | 6.5   | 0.53 |
|       | Average | 16.7                       | 793                | 4.9   | 0.37 |
| 0.8 M | Max     | 18.6                       | 885                | 9.8   | 0.60 |
|       | Average | 17.9                       | 859                | 7.2   | 0.47 |

**Table S2.** The fitted charge transport lifetimes and charge carrier lifetimes of MP perovskite solar devices with different sizes and island-like perovskite cell (w/o PS) under different incident light intensity.

|           | Time/ $\mu$ s                  | 33.3 mW cm <sup>-2</sup> | 56.8 mW cm <sup>-2</sup> | 80.3 mW cm <sup>-2</sup> | 100.0 mW cm <sup>-2</sup> |
|-----------|--------------------------------|--------------------------|--------------------------|--------------------------|---------------------------|
| w/o. PS   | $\tau_{\text{charge-carrier}}$ | 42.8                     | 37.4                     | 36.6                     | 35.7                      |
|           | $\tau_{\text{trans}}$          | 11.1                     | 10.6                     | 10.4                     | 10.0                      |
| 200 nmMP  | $\tau_{\text{charge-carrier}}$ | 64.9                     | 59.45                    | 52.3                     | 49.4                      |
|           | $\tau_{\text{trans}}$          | 10.0                     | 9.4                      | 9.1                      | 8.8                       |
| 400 nm MP | $\tau_{\text{charge-carrier}}$ | 75.9                     | 70.1                     | 63.9                     | 60.3                      |
|           | $\tau_{\text{trans}}$          | 9.1                      | 8.9                      | 8.7                      | 8.5                       |
| 600 nm MP | $\tau_{\text{charge-carrier}}$ | 53.9                     | 47.7                     | 43.7                     | 41.0                      |
|           | $\tau_{\text{trans}}$          | 10.4                     | 9.8                      | 9.5                      | 9.3                       |



**Table S3** The fitted  $R_{\text{HTM}}$  and  $R_{\text{rec}}$  of MP perovskite solar devices with different sizes and island-like perovskite cell (w/o PS) according to the Nyquist plots.

|           | $R_{\text{HTM}}/\Omega \text{ cm}^2$ | $R_{\text{rec}}/\Omega \text{ cm}^2$ |
|-----------|--------------------------------------|--------------------------------------|
| w/o PS    | 32.21                                | 76.89                                |
| 200 nm MP | 31.17                                | 132.4                                |
| 400 nm MP | 27.64                                | 172.2                                |
| 600 nm MP | 31.46                                | 112.3                                |
